# Supplementary material for: Validating Well-Functioning Hepatic Organoids for Toxicity Evaluation
Source: MDPI journal article supplement (doi:10.3390/toxics12050371), 2024-05-17
Supplement: s1 [file s1]

**Table S1.** List of RT-PCR oligo primer sequences.

| Name    | Sequence (5' → 3', forward)     | Sequence (5' → 3', reverse)     |
|---------|---------------------------------|---------------------------------|
| CYP2D6  | TGA AGG ATG AGG CCG TCT GGG AGA | CAG TGG GCA CCG AGA AGC TGA AGT |
| CYP2C8  | CAT TAC TGA CTT CCG TGC TAC AT  | CTC CTG CAC AAA TTC GTT TTC C   |
| CYP2C9  | CAG AGA CGA CAA GCA CAA CCC T   | GTG GCT CCT GTC TTG CAT GCA     |
| CYP2C19 | CTG TGC CTG GTC TAA TGT TAC TT  | AAG CAT GAC AAA ACA CAT GAG C   |
| MDR1    | TTG CTG CTT ACA TTC AGG TTT CA  | AGC CTA TCT CCT GTC GCA TTA     |
| MRP2    | TGC AGC CTC CAT AAC CAT GAG     | GAT GCC TGC CAT TGG ACC TA      |
| NTCP    | TGA TGC TCT TCC CCA CAT T       | CAT GCG CTA TGT CAT CAA GG      |
| β-actin | GGACTTCGAGCAAGAGATGG            | AGCACTGTGTTGGCGTACAG            |

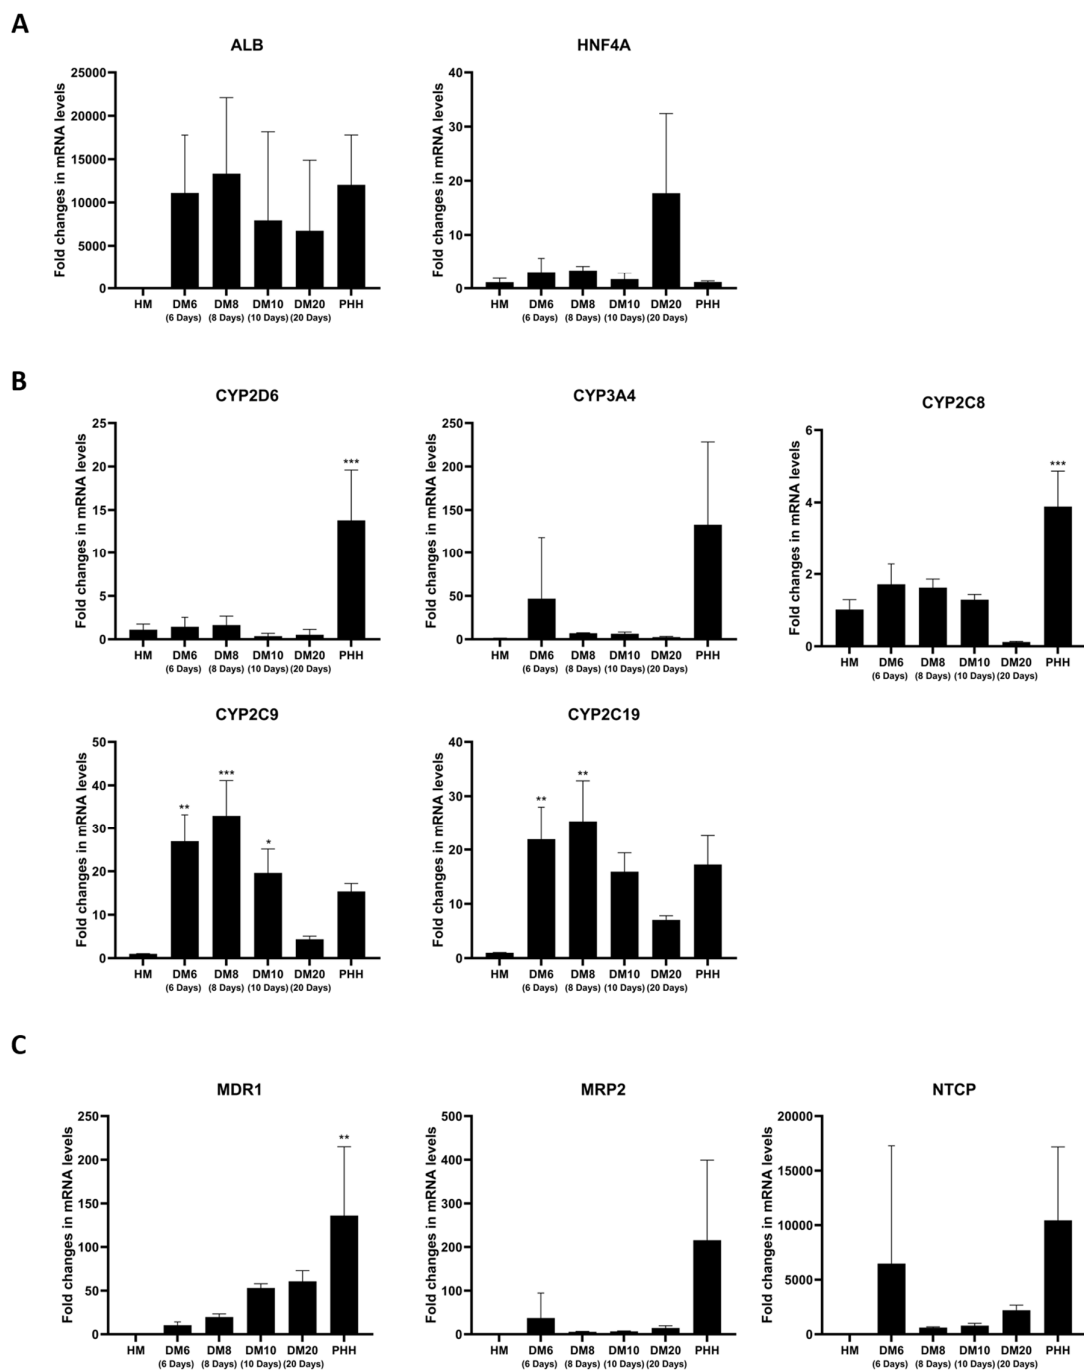

**Figure S1. RT-qPCR of long term differentiated liver organoids and primary human hepatocyte.** mRNA expression of hepatocyte markers (A), phase I enzymes of xenobiotics (B), and drug transporter (C). Data are expressed as mean  $\pm$  standard deviation ( $n = 3$ ) and compared by one-way analysis of variance with Tukey's post-hoc to HM. \*  $p < 0.05$ ; \*\*  $p < 0.01$ ; and \*\*\*  $p < 0.001$ .
